# Supplementary material for: Effects of Hormone Therapy on Cognition and Mood in Recently Postmenopausal Women: Findings from the Randomized, Controlled KEEPS–Cognitive and Affective Study
Source: PubMed Central journal article supplement (PMC4452757; doi:10.1371/journal.pmed.1001833), 2015-06-02
Supplement: pmed.1001833.s001.pdf [file pmed.1001833.s001.pdf]

**S1 Table.** Among Women Completing the Symptom Scale, the Number and Percent of Women Reporting Moderate to Severe Hot Flashes, by Treatment Group and Visit.

|                                                                                    | Placebo<br>N = 262 | o-CEE<br>N = 220  | t-E2<br>N = 211   |
|------------------------------------------------------------------------------------|--------------------|-------------------|-------------------|
| Hot flashes, N (% of randomization group) reporting moderate to severe hot flashes |                    |                   |                   |
| At Baseline, N=693                                                                 | 120/262<br>(45.8%) | 96/220<br>(43.6%) | 88/211<br>(41.7%) |
| At 6 months,* N=589                                                                | 64/224<br>(28.6 %) | 8/185<br>(4.3%)   | 12/180<br>(6.7%)  |
| At 12 months,* N=590                                                               | 46/222<br>(20.7%)  | 7/190<br>(8.4%)   | 15/178<br>(3.7%)  |
|                                                                                    |                    |                   |                   |

\**p*-value <0.01
