# Supplementary material for: Effects of Hormone Therapy on Cognition and Mood in Recently Postmenopausal Women: Findings from the Randomized, Controlled KEEPS–Cognitive and Affective Study
Source: PubMed Central journal article supplement (PMC4452757; doi:10.1371/journal.pmed.1001833), 2015-06-02
Supplement: pmed.1001833.s002.pdf [file pmed.1001833.s002.pdf]

**S2 Table.** Assessment of Participant Blinding for Women in KEEPS-Cog. Women were asked whether they thought they were on active MHT or placebo at the end of the study.

|                                                                                                                     | Placebo<br>N = 208 | o-CEE<br>N = 167 | t-E2<br>N = 161 |
|---------------------------------------------------------------------------------------------------------------------|--------------------|------------------|-----------------|
| Unblinding: Women were asked whether they thought they were on active MHT or placebo at the end of the study, N=536 |                    |                  |                 |
| Number (%) guessed MHT assignment                                                                                   | 72<br>(34.6%)      | 144<br>(89.4%)   | 133<br>(80.2%)  |
| Number (%) guessed Placebo assignment                                                                               | 136<br>(65.4%)     | 33<br>(19.8%)    | 17<br>(10.6%)   |
