# Supplementary material for: Effects of Hormone Therapy on Cognition and Mood in Recently Postmenopausal Women: Findings from the Randomized, Controlled KEEPS–Cognitive and Affective Study
Source: PubMed Central journal article supplement (PMC4452757; doi:10.1371/journal.pmed.1001833), 2015-06-02
Supplement: pmed.1001833.s003.pdf [file pmed.1001833.s003.pdf]

**S3 Table.** Treatment efficacy: beta estimates BDI-II scores across treatment duration.

|               | <i>Treatment Groups Compared to Placebo<sup>b</sup></i> |                       |                |  |                                  |                       |                |
|---------------|---------------------------------------------------------|-----------------------|----------------|--|----------------------------------|-----------------------|----------------|
|               | <i>o-CEE vs Placebo</i>                                 |                       |                |  | <i>t-E2 vs Placebo</i>           |                       |                |
|               | <i>Beta Estimate<sup>d</sup></i>                        | <i>SE</i>             | <i>p-value</i> |  | <i>Beta Estimate<sup>d</sup></i> | <i>SE</i>             | <i>p-value</i> |
| <i>BDI-II</i> | -8.66x10 <sup>-3</sup>                                  | 1.11x10 <sup>-2</sup> | 0.436          |  | -3.13x10 <sup>-3</sup>           | 1.11x10 <sup>-2</sup> | 0.782          |
